# Supplementary material for: Drug-induced Endometrial Cancer: A Pharmacovigilance Study Based on Real-World Data from the FAERS Database
Source: Research Square preprint supplement (doi:10.21203/rs.3.rs-6733006/v1), 2025-07-15
Supplement: Supplementary file 1 [file 780f4fbc3051e2ffee488354.xlsx]

## Sheet: Sheet 1
ORDER
